# Supplementary material for: Chemically induced degradation of epigenetic targets
Source: Royal Society of Chemistry journal article supplement (doi:10.1039/d3cs00100h), 2023-01-01
Supplement: d3cs00100h1.pdf [file d3cs00100h1.pdf]

## **Supplemental Information**

### **Chemically Induced Degradation of Epigenetic Targets**

Md Kabir<sup>1</sup>, Xufen Yu<sup>1</sup>, H. Ümit Kaniskan<sup>1\*</sup>, and Jian Jin<sup>1\*</sup>

<sup>1</sup>Mount Sinai Center for Therapeutics Discovery, Departments of Pharmacological Sciences, Oncological Sciences and Neuroscience, Tisch Cancer Institute, Icahn School of Medicine at Mount Sinai, New York, New York 10029, United States

\* Correspondence: [jian.jin@mssm.edu](mailto:jian.jin@mssm.edu) (J.J.) or [husnu.kaniskan@mssm.edu](mailto:husnu.kaniskan@mssm.edu) (H.U.K.)

## Summary Table 1: Heterobifunctional degraders for epigenetic targets

| Epigenetic Effector | Target (POI) | Compound | E3 Ligase | Disease | DC <sub>50</sub> <sup>a</sup> | Time <sup>b</sup> | In-vivo study | Ref <sup>c</sup> |
|---------------------|--------------|----------|-----------|---------|-------------------------------|-------------------|---------------|------------------|
| <b>Writers</b>      | EZH2         | MS1943   | -         | TNBC    | ~2.5 $\mu$ M                  | 24h               | Yes           | 35               |
|                     |              | E7       | CRBN      | DLBCL   | ~1 $\mu$ M                    | 48h               | No            | 37               |
|                     |              | YM181    | VHL       | DLBCL   | ~1 $\mu$ M                    | 48h               | No            | 39               |
|                     |              | YM281    | VHL       | DLBCL   | ~1 $\mu$ M                    | 48h               | Yes           | 39               |
|                     |              | MS177    | CRBN      | AML     | 0.2 $\mu$ M                   | 16h               | Yes           | 15               |

|  |      |        |      |      |                |     |     |    |
|--|------|--------|------|------|----------------|-----|-----|----|
|  |      | U3i    | CRBN | TNBC | ~1 $\mu$ M     | 48h | No  | 40 |
|  |      | MS8815 | VHL  | TNBC | 0.14 $\mu$ M   | 48h | No  | 41 |
|  | WDR5 | 8g     | VHL  | AML  | 0.056 $\mu$ M  | 24h | No  | 50 |
|  |      | 17b    | VHL  | AML  | 1.24 $\mu$ M   | 24h | No  | 50 |
|  |      | MS33   | VHL  | AML  | 0.26 $\mu$ M   | 18h | No  | 51 |
|  |      | MS67   | VHL  | AML  | 0.0037 $\mu$ M | 18h | Yes | 51 |
|  |      | MS40   | CRBN | AML  | 0.05 $\mu$ M   | 18h | Yes | 52 |
|  | NSD3 | MS9715 | VHL  | AML  | 4.9 $\mu$ M    | 48h | No  | 62 |

|  |           |            |      |                 |                                                     |        |     |    |
|--|-----------|------------|------|-----------------|-----------------------------------------------------|--------|-----|----|
|  |           | Compound 8 | VHL  | NSCLC           | 1.43 $\mu$ M                                        | 72h    | Yes | 63 |
|  | NSD2      | MS159      | CRBN | MM              | 5.2 $\mu$ M                                         | 48h    | No  | 65 |
|  | PRMT5     | MS4322     | VHL  | Multiple cancer | 1.1 $\mu$ M                                         | 6 days | No  | 72 |
|  | PCAF/GCN5 | GSK983     | CRBN | Inflammation    | PCAF –<br>0.0015 $\mu$ M<br>GCN5 –<br>0.003 $\mu$ M | 5 days | No  | 81 |
|  | P300/CBP  | dCBP-1     | CRBN | MM              | ~ 0.001 $\mu$ M                                     | 6h     | No  | 82 |
|  |           | JQAD1      | CRBN | NB              | ~ 3 $\mu$ M                                         | 24h    | Yes | 85 |
|  |           |            |      |                 |                                                     |        |     |    |

|         |      |          |      |      |                  |     |     |     |
|---------|------|----------|------|------|------------------|-----|-----|-----|
| Readers | BRD4 | MZ1      | VHL  | -    | 0.1 $\mu$ M      | 24h | No  | 99  |
|         |      | AT1      | VHL  | -    | $\sim$ 1 $\mu$ M | 24h | No  | 19  |
|         |      | ARV-771  | VHL  | CRPC | 0.005 $\mu$ M    | 16h | Yes | 100 |
|         |      | MZP-54   | VHL  | AML  | < 0.05 $\mu$ M   | 24h | No  | 101 |
|         |      | dBET1    | CRBN | AML  | <0.1 $\mu$ M     | 18h | Yes | 103 |
|         |      | dBET6    | CRBN | AML  | <0.1 $\mu$ M     | 3h  | Yes | 105 |
|         |      | ARV-825  | CRBN | CCA  | <0.001 $\mu$ M   | 24h | No  | 104 |
|         |      | BETd-260 | CRBN | AML  | <0.001 $\mu$ M   | 3h  | Yes | 106 |

|  |             |             |      |                  |                                                           |     |     |     |
|--|-------------|-------------|------|------------------|-----------------------------------------------------------|-----|-----|-----|
|  |             | QCA570      | CRBN | AML              | <0.001 $\mu$ M                                            | 3h  | Yes | 108 |
|  |             | Compound 15 | CRBN | AML              | <0.001 $\mu$ M                                            | 3h  | No  | 109 |
|  | EED         | UNC6852     | VHL  | DLBCL            | 0.247 $\mu$ M                                             | 24h | No  | 117 |
|  |             | PROTAC 1/2  | VHL  | NHL              | ~0.12 $\mu$ M                                             | 48h | No  | 119 |
|  | BMI1/RING1B | MS147       | VHL  | Multiple cancers | ~5 $\mu$ M                                                | 24h | No  | 126 |
|  | TRIM24      | dTRIM24     | VHL  | AML              | ~5 $\mu$ M                                                | 24h | No  | 133 |
|  | BRD9        | dBRD9       | CRBN | AML              | 0.05 $\mu$ M                                              | 4h  | No  | 143 |
|  | BRD7/9      | VZ185       | VHL  | DLBCL            | BRD7 –<br>0.0045 $\mu$ M<br><br>GCN5 –<br>0.00176 $\mu$ M | 4h  | No  | 145 |

|  |           |            |      |       |                                                          |     |     |     |
|--|-----------|------------|------|-------|----------------------------------------------------------|-----|-----|-----|
|  | SMARCA2/4 | ACBI1      | VHL  | AML   | SMARCA2 -<br>0.006 $\mu$ M<br>SMARCA4 -<br>0.011 $\mu$ M | 18h | No  | 151 |
|  |           | AU-15330   | VHL  | CRPC  | ~1 $\mu$ M                                               | 8h  | Yes | 152 |
|  |           | ACBI2      | VHL  | NSCLC | SMARCA2 -<br>0.001 $\mu$ M<br>SMARCA4 -<br>0.032 $\mu$ M | 18h | Yes | 154 |
|  |           | A947       | VHL  | NSCLC | SMARCA2<br><0.001 $\mu$ M<br>SMARCA4 -<br>0.0011 $\mu$ M | 18h | Yes | 155 |
|  | ENL       | SR-1114    | CRBN | AML   | 10 $\mu$ M                                               | 16h | No  | 167 |
|  |           | Compound 1 | CRBN | AML   | 0.037 $\mu$ M                                            | 24h | Yes | 168 |
|  |           |            |      |       |                                                          |     |     |     |

|         |           |              |      |               |                      |     |    |     |
|---------|-----------|--------------|------|---------------|----------------------|-----|----|-----|
| Erasers | HDAC1/2/3 | Compound 4   | VHL  | CC            | <0.1 $\mu\text{M}$   | 24h | No | 176 |
|         | HDAC3     | XZ9002       | VHL  | TNBC          | 0.063 $\mu\text{M}$  | 14h | No | 178 |
|         | HDAC6     | dHDAC6       | CRBN | Breast Cancer | 0.034 $\mu\text{M}$  | 12h | No | 179 |
|         |           | Compound 12d | CRBN | MM            | 0.0016 $\mu\text{M}$ | 6h  | No | 181 |
|         |           | NP8          | CRBN | MM            | 0.0038 $\mu\text{M}$ | 24h | No | 182 |
|         |           | Compound 3j  | VHL  | MM            | 0.0071 $\mu\text{M}$ | 6h  | No | 183 |
|         | SIRT2     | Protac 12    | CRBN | -             | 0.2 $\mu\text{M}$    | 4h  | No | 186 |

<sup>a</sup>DC<sub>50</sub> values were taken from the primary references when explicitly reported and DC50 values, when they were not reported by the primary references, were estimated based on the reported data such as Western Blots and shown in the table with “~” or “<” symbols.



<sup>b</sup> Time listed is the treatment time used to calculate DC50 when reported or it is the treatment time of the dose response data used for the DC50 estimation.

<sup>c</sup> References listed here refers to the citation in the main manuscript text.
